# Supplementary material for: The ubiquity of phenotypic plasticity in plants: a synthesis
Source: PubMed Central journal article supplement (PMC4569034; doi:10.1002/ece3.1603), 2015-07-23

fig. S1

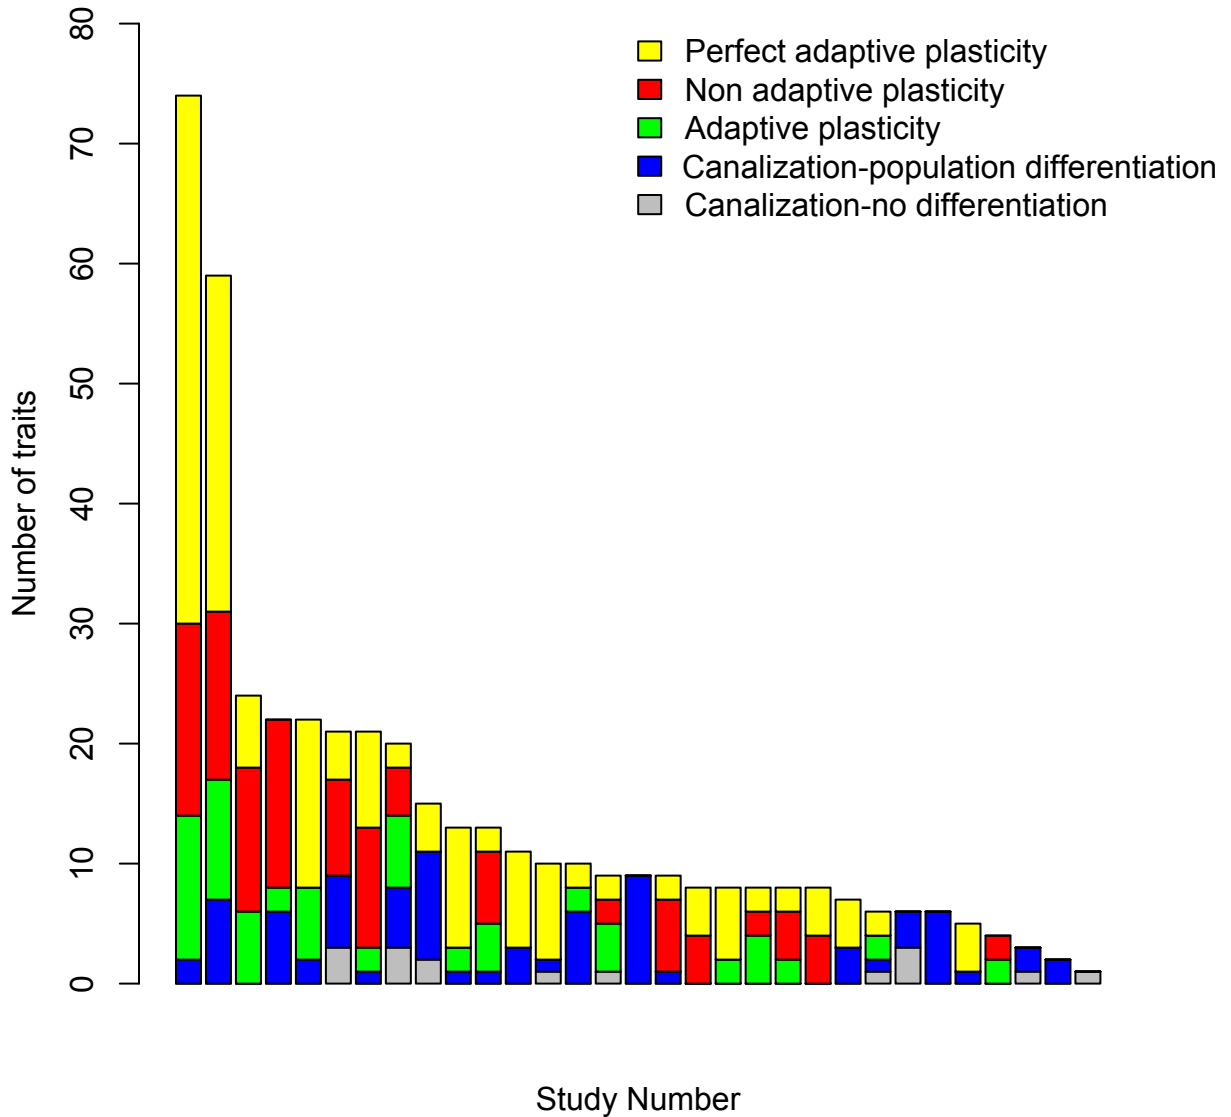

Supplement: ece30005-3389-sd1.pdf [file ece30005-3389-sd1.pdf]
